# Supplementary material for: Carbohydrate-Free Peach (Prunus persica) and Plum (Prunus domestica) Juice Affects Fecal Microbial Ecology in an Obese Animal Model
Source: PubMed Central journal article supplement (PMC4090149; doi:10.1371/journal.pone.0101723), 2014-07-09
Supplement: pone.0101723.s005.pdf [file pone.0101723.s005.pdf]

**Carbohydrate-free peach (*Prunus persica*) and plum (*Prunus domestica*) juice affects fecal microbial ecology in an obese animal model**

Giuliana D. Noratto<sup>1,a,b</sup>, Jose F. Garcia-Mazcorro<sup>2,b</sup>, Melissa Markel<sup>3</sup>, Hercia S. Martino<sup>1</sup>, Yasushi Minamoto<sup>3</sup>, Jörg M. Steiner<sup>3</sup>, David Byrne<sup>4</sup>, Jan S. Suchodolski<sup>3</sup> & Susanne U. Mertens-Talcott<sup>1,5\*</sup>

**1** Department of Nutrition and Food Science, Texas A&M University, College Station, Texas, United States of America

**2** Facultad de Medicina Veterinaria y Zootecnia, Universidad Autónoma de Nuevo León, General Escobedo, Nuevo León, México

**3** Gastrointestinal Laboratory, Texas A&M University, College Station, Texas, United States of America

**4** Department of Horticultural Sciences, Texas A&M University, College Station, Texas, United States of America

**5** Veterinary Physiology and Pharmacology, Texas A&M University, College Station, Texas, United States of America

<sup>a</sup> Current address: School of Food Science, Washington State University, USA.

<sup>b</sup> These authors contributed equally to this study.

\* **Email:** SMTalcott@tamu.edu

**Table S2** Median (minimum-maximum) indices of bacterial diversity (Shannon Weaver and Chao1 3%) and richness (OTUs 3%) obtained from fecal samples of one lean subject, control, peach and plum groups. *P* values come from the non-parametric Kruskal-Wallis.

|         | Lean* | Control ( <i>n</i> =4)     | Peach ( <i>n</i> =4)       | Plum ( <i>n</i> =4)        | P value |
|---------|-------|----------------------------|----------------------------|----------------------------|---------|
| Chao1   | 699   | 512 (427-530) <sup>a</sup> | 567 (561-598) <sup>b</sup> | 487 (466-543) <sup>a</sup> | 0.0244  |
| Shannon | 7.7   | 6.9 (6.5-7.4)              | 7.1 (6.7-7.5)              | 7.4 (6.9-7.4)              | 0.7939  |
| OTUs    | 475   | 361 (326-410)              | 395 (392-410)              | 353 (334-406)              | 0.2628  |

These estimates are based on 2477-sequences subsamples. Different superscripts indicate statistical significance ( $p < 0.05$ ). \*The estimates of the lean subject were not included in the statistical analysis.
