# Supplementary material for: Carbohydrate-Free Peach (Prunus persica) and Plum (Prunus domestica) Juice Affects Fecal Microbial Ecology in an Obese Animal Model
Source: PubMed Central journal article supplement (PMC4090149; doi:10.1371/journal.pone.0101723), 2014-07-09
Supplement: pone.0101723.s007.pdf [file pone.0101723.s007.pdf]

**Carbohydrate-free peach (*Prunus persica*) and plum (*Prunus domestica*) juice affects fecal microbial ecology in an obese animal model**

Giuliana D. Noratto<sup>1,a,b</sup>, Jose F. Garcia-Mazcorro<sup>2,b</sup>, Melissa Markel<sup>3</sup>, Hercia S. Martino<sup>1</sup>, Yasushi Minamoto<sup>3</sup>, Jörg M. Steiner<sup>3</sup>, David Byrne<sup>4</sup>, Jan S. Suchodolski<sup>3</sup> & Susanne U. Mertens-Talcott<sup>1,5\*</sup>

**1** Department of Nutrition and Food Science, Texas A&M University, College Station, Texas, United States of America

**2** Facultad de Medicina Veterinaria y Zootecnia, Universidad Autónoma de Nuevo León, General Escobedo, Nuevo León, México

**3** Gastrointestinal Laboratory, Texas A&M University, College Station, Texas, United States of America

**4** Department of Horticultural Sciences, Texas A&M University, College Station, Texas, United States of America

**5** Veterinary Physiology and Pharmacology, Texas A&M University, College Station, Texas, United States of America

<sup>a</sup> Current address: School of Food Science, Washington State University, USA.

<sup>b</sup> These authors contributed equally to this study.

\* **Email:** SMTalcott@tamu.edu

**Table S4** Median (minimum-maximum) concentrations ( $\mu\text{mol/g}$  of wet feces) of short-chain fatty acids obtained from fecal samples of the control, peach, plum, and lean groups. P values come from the non-parametric Kruskal-Wallis.

|                 | Control ( <i>n</i> =5)        | Peach ( <i>n</i> =6)            | Plum ( <i>n</i> =8)             | Lean ( <i>n</i> = 5)            | P value |
|-----------------|-------------------------------|---------------------------------|---------------------------------|---------------------------------|---------|
| Acetic acid     | 61.3 <sup>a</sup> (46.5-92.3) | 38.6 <sup>a,b</sup> (27.0-68.2) | 46.2 <sup>b,c</sup> (24.8-59.9) | 29.2 <sup>b,c</sup> (25.3-45.1) | 0.0439  |
| Propionic acid  | 9.9 <sup>a</sup> (6.4-10.9)   | 4.3 <sup>b</sup> (0.0-7.8)      | 5.6 <sup>a,c</sup> (2.5-10.3)   | 2.3 <sup>b</sup> (0.0-7.1)      | 0.0184  |
| Butyric acid    | 10.2 (5.1-14.0)               | 6.2 (1.9-11.5)                  | 5.8 (2.1-8.5)                   | 3.1 (1.5-10.6)                  | 0.1864  |
| Isobutyric acid | 0.6 (0.0-0.8)                 | 0.4 (0.1-0.9)                   | 0.3 (0.1-0.8)                   | 0.4 (0.2-1.7)                   | 0.6564  |
| Isovaleric acid | 0.3 (0.2-0.4)                 | 0.3 (0.2-0.5)                   | 0.3 (0.2-0.5)                   | 0.4 (0.1-1.4)                   | 0.5858  |
| Valeric acid    | 1.0 (0.4-1.3)                 | 0.6 (0.2-0.9)                   | 0.8 (0.3-1.1)                   | 0.5 (0.2-1.6)                   | 0.4575  |

Medians not sharing a common superscript are significantly different ( $p < 0.05$ ).
